1 **Title:** Temperature selection drives evolution of function-valued traits in a marine diatom

2

3 **Authors:**

4 1. Daniel R. O'Donnell<sup>1,2,3</sup> ([odonn146@msu.edu](mailto:odonn146@msu.edu))

5 2. Carolyn R. Hamman<sup>1</sup> ([crh44@miami.edu](mailto:crh44@miami.edu))

6 3. Evan C. Johnson<sup>1</sup> ([evcjohnson@ucdavis.edu](mailto:evcjohnson@ucdavis.edu))

7 4. Christopher A. Klausmeier<sup>1,3,4</sup> ([klausmel@msu.edu](mailto:klausmel@msu.edu))

8 5. Elena Litchman<sup>1,2</sup> ([litchman@msu.edu](mailto:litchman@msu.edu))

9

10 **Affiliations:**

11 <sup>1</sup>W. K. Kellogg Biological Station, Michigan State University, Hickory Corners, MI 49060

12 <sup>2</sup>Department of Integrative Biology, Michigan State University, East Lansing, MI

13 <sup>3</sup>Program in Ecology, Evolutionary Biology and Behavior, MSU, East Lansing, MI

14 <sup>4</sup>Department of Plant Biology, Michigan State University, East Lansing, MI

15

16 **Contributions:** DRO designed all assays, designed and maintained the evolution experiment,  
17 conducted all statistical analyses and wrote the manuscript. CRH assisted in experimental design  
18 and carried out most of the trait assays. ECJ conducted some trait assays and contributed  
19 modeling and statistical expertise. CAK constructed the models and edited the manuscript. EL  
20 conceived the idea, designed the experiments with DRO, supervised experiments, provided  
21 material, personnel and grant support, and edited the manuscript.

22

23 **Running title:** Experimental thermal adaptation in a diatom

24

25 **Keywords:** Thermal reaction norm; Thermal optimum; Experimental evolution; Tradeoffs,  
26 *Thalassiosira pseudonana*; Nitrate affinity

27

28 **Abstract words:** 208

29

30 **Main text words:** 5217

31

32 **References:** 63

33

34 **Figures:** 6

35

36 **Corresponding author:**

37 Daniel R. O'Donnell

38 Kellogg Biological Station

39 3700 E. Gull Lake Dr.

40 Hickory Corners, MI 49060

41 +1 505 702 7354

42 [odonn146@msu.edu](mailto:odonn146@msu.edu)

43

44

45

46

47 **Abstract**

48           Rapid evolution in response to environmental change will likely be a driving force  
49 determining the distribution of species and the structure of communities across the biosphere in  
50 coming decades. This is especially true of microorganisms, many of which may be able to evolve  
51 in step with rising temperatures. An ecologically indispensable group of microorganisms with  
52 great potential for rapid thermal adaptation are the phytoplankton, the diverse photosynthetic  
53 microbes forming the foundation of most aquatic food webs. We tested the capacity of a globally  
54 important phytoplankton species, the marine diatom *Thalassiosira pseudonana*, for rapid  
55 evolution in response to temperature. Evolution of replicate populations at 16 and 31°C for 350-  
56 450 generations led to significant divergence in several traits associated with *T. pseudonana*'s  
57 thermal reaction norm (TRN) for per-capita population growth, as well as in its competitive  
58 ability for nitrogen (commonly limiting in marine systems). Of particular interest were evolution  
59 of the optimum temperature for growth, the upper critical temperature, and the derivative of the  
60 TRN, an indicator of potential tradeoffs resulting from local adaptation to temperature. This  
61 study offers a broad examination of the evolution of the thermal reaction norm and how modes  
62 of TRN variation may govern a population's long-term physiological, ecological, and  
63 biogeographic response to global climate change.

64

65 **Introduction**

66           The dependence of physiological processes on temperature is perhaps the most important  
67 underlying factor determining the fitness of organisms across latitudinal and altitudinal gradients,  
68 and thus their distributions and abundances across the planet. In light of recent climate warming,  
69 many studies have focused on temperature dependence of physiological traits (e.g.

70 photosynthesis, respiration, per-capita population growth) near the upper bounds of organisms’  
71 thermal tolerance ranges (Rowan 2004; Bradford 2013; Listmann *et al.* 2016) and the ecological  
72 consequences of temperatures rising beyond those ranges (Rowan 2004; Thomas *et al.* 2012).  
73 The focus of many of these studies is increasingly on the potential for rapid evolution of  
74 physiological traits in response to temperature change, and how such evolution may mitigate the  
75 ecological impacts of climate warming (Hoffmann & Sgrò 2011; Schlüter *et al.* 2014; Listmann  
76 *et al.* 2016).

77 Evolution on ecological timescales may be commonplace (Schoener, 2011) and can  
78 ‘rescue’ populations from potentially catastrophic environmental change (Gomulkiewicz and  
79 Holt 1995; Bell 2013; Schiffers *et al.* 2013). This is especially true of microorganisms, which  
80 can have enormous population sizes, and many of which reproduce on timescales on the order of  
81 minutes to days; these attributes offer many opportunities for mutation and subsequent natural  
82 selection to lead to rapid evolution in response to environmental change. Despite the high  
83 potential of microbes to adapt to changing environmental conditions, little is known about how a  
84 prominent aquatic microbial group, phytoplankton, evolves in response to global change  
85 stressors, particularly temperature. Phytoplankton are a diverse group of global importance: they  
86 are the foundation of most marine and freshwater food webs and are major drivers of global  
87 biogeochemical cycles, carrying out ~50 % of global carbon fixation (Field *et al.* 1998) and  
88 linking nitrogen and phosphorus cycles (Redfield, 1958). Rising temperatures may negatively  
89 impact phytoplankton productivity, biomass and species diversity (Boyce *et al.* 2010; Thomas *et*  
90 *al.* 2012). However, given their high rates of reproduction and large population sizes, some  
91 phytoplankton may be capable of rapid evolution in response to warming, mitigating some  
92 ecological impacts of global climate change (Litchman *et al.* 2012; Listmann *et al.* 2016). For

93 example, evolutionary change in  $T_{\text{opt}}$  and  $CT_{\text{max}}$  in response to ocean warming may reduce heat-  
94 induced mortality and poleward migration of phytoplankton populations, allowing some to  
95 persist at low latitudes where they might otherwise go regionally extinct (Thomas *et al.* 2012);  
96 such change could mitigate some of the potential broad ecological consequences of regional  
97 depletion of phytoplankton diversity.

98         A number of recent evolution experiments have sought to elucidate how marine  
99 phytoplankton evolve to cope with environmental change (Reusch & Boyd 2013), though to date  
100 most have focused on increased atmospheric  $p\text{CO}_2$  and/or ocean acidification (Jin *et al.* 2013;  
101 Crawford *et al.* 2011; Lohbeck *et al.* 2012). Surprisingly, thermal adaptation has been studied  
102 experimentally in only a couple of phytoplankton species to date, only one of which, a  
103 coccolithophorid, was a marine species of global importance (Padfield *et al.* 2015; Schlüter *et al.*  
104 2014; Listmann *et al.* 2016). It is therefore difficult to predict if other ecologically important  
105 groups, such as diatoms that contribute up to 25% of all global carbon fixation (Nelson *et al.*  
106 1995), would respond in a similar way. Moreover, while we may expect  $T_{\text{opt}}$  and  $CT_{\text{max}}$  to  
107 increase after evolving at high temperatures, knowledge of how other important traits may  
108 change in response to elevated temperatures is somewhat limited, to date. An important first step  
109 toward understanding multi-trait evolutionary responses to warming was an experimental study  
110 by Schlüter *et al.* (2014), who found that after one year of experimental adaptation to elevated  
111 temperature (26.3 °C), the marine coccolithophore *Emiliana huxleyi* increased its per-capita  
112 population growth rate by up to 16% under both ambient and elevated  $p\text{CO}_2$ ; warm-adapted  
113 populations also evolved smaller cell diameter and lower particulate organic and inorganic  
114 carbon content compared to cold (15 °C)-adapted populations assayed at 26.3 °C under ambient  
115  $p\text{CO}_2$ . In a follow-up study, Listmann *et al.* (2016) observed that both the optimal temperature

116 for growth ( $T_{\text{opt}}$ ) and the maximum temperature at which growth stops (referred to as upper  
117 critical temperature,  $CT_{\text{max}}$  herein) increased in warm-adapted populations of *E. huxleyi*  
118 compared to cold-adapted strains under both ambient and elevated  $p\text{CO}_2$ .

119 While many quantitative traits can be defined by a single number (e.g. the depth of a finch's  
120 beak), biological rates in ectotherms vary continuously across temperature—they are thus often  
121 referred to as “function-valued traits” (Kingsolver *et al.* 2001). Our understanding of how  
122 diverse function-valued traits may evolve in different organisms is limited. Various tradeoffs,  
123 such as generalist-specialist or resource-allocation tradeoffs, may be important in determining  
124 how the shapes of trait functions, including the thermal reaction norm (TRN), evolve (Angilletta  
125 *et al.* 2003). By definition, the trait values derived from TRN and many other function-valued  
126 traits are non-independent across environmental (e.g. temperature) gradients (Angilletta *et al.*  
127 2003); thus, selection at one temperature may alter biological rates (e.g. population growth rate)  
128 at every other temperature along the TRN. Selection may change the slope and curvature at every  
129 point as well (Kutcherov 2016), especially if some regions of the TRN are more evolutionarily  
130 labile than others (Araújo *et al.* 2013). While recent studies showed that  $T_{\text{opt}}$  and  $CT_{\text{max}}$  increase  
131 after evolving at higher temperatures (Listmann *et al.* 2016), we do not know how the whole  
132 TRN may evolve in phytoplankton, for example, if adaptation to high temperatures would lead to  
133 a decrease in fitness at low temperatures, as previously observed in bacteria (Bennett & Lenski  
134 1993) and bacteriophages (Knies *et al.* 2006).

135 The TRN for population growth is an emergent property of the temperature dependences  
136 of enzyme activities (Ratkowsky *et al.* 2005; Corkrey *et al.* 2014), and few processes or  
137 pathways within the cell should be immune to the effects of directional temperature selection  
138 (Nedwell 1999; Baker *et al.* 2016; Padfield *et al.* 2016). Depending on the genes affected (and

139 thus the mechanism by which thermal adaptation is achieved), changes in maximum growth rate  
140 may be accompanied by changes in traits not directly associated with the TRN. For example,  
141 changes in stoichiometry in response to thermal adaptation (e.g. Schlüter *et al.* 2014) may be due  
142 to changes in relative resource requirements of phytoplankton cells, which in turn may affect  
143 species' competitive abilities (e.g. for N and P) and ultimately global biogeochemical cycles  
144 (Redfield 1958; Litchman *et al.* 2007; Baker *et al.* 2016). An increase in maximum growth rate  
145 at the selection temperature may lead to a decrease in affinity for a given nutrient due to a  
146 tradeoff between allocation of cellular resources to reproduction versus nutrient uptake (Grover  
147 1991; Klausmeier *et al.* 2004). If the nutrient in question is never limiting, selection may favor a  
148 high maximum growth rate over affinity, and the tradeoff may ultimately result in a weakening  
149 of competitive ability for that nutrient in the selection environment.

150         To address the need for studies of the broad physiological and ecological consequences  
151 of thermal adaptation in phytoplankton, we performed a long-term selection experiment  
152 investigating the effects of prolonged exposure to temperatures above and below the growth  
153 optimum on a suite of temperature-dependent traits in a model marine diatom, *Thalassiosira*  
154 *pseudonana*. We evolved this diatom in replicate populations at two different temperatures (16  
155 and 31°C) for 18 months (~400 generations). Throughout this period, we monitored the  
156 maximum (nutrient-saturated) growth rates of the replicate populations (five at each temperature)  
157 and conducted temperature-dependent growth assays to determine whether and how thermal  
158 adaptation leads to evolutionary change in TRN for population growth and the traits associated  
159 with it:  $T_{\text{opt}}$ ,  $CT_{\text{max}}$ , maximum growth rate ( $\mu_{\text{max}}$ ) at  $T_{\text{opt}}$  ( $\mu_{\text{opt}}$ ),  $\mu_{\text{max}}$  at the selection temperatures,  
160 and the curvature of the TRN at and below  $T_{\text{opt}}$ . We also conducted nutrient-dependent growth  
161 assays on all replicate populations at both selection temperatures to investigate the consequences

162 of thermal adaptation for nitrate growth affinity, an important trait contributing to nitrate  
163 competitive ability (Tilman 1982)—i.e whether selection for allocation of resources to  
164 reproductive machinery over nitrate uptake machinery led to a trade-off between nitrate growth  
165 affinity and maximum growth rate (Grover 1997; Litchman & Klausmeier 2001).

166

## 167 **Methods**

### 168 Temperature selection experiment

169 We obtained a monoculture of *Thalassiosira pseudonana* CCMP1335 (Hustedt) Hasle et  
170 Heimdal from the Provasoli-Guillard National Center for Culture of Marine Phytoplankton  
171 (CCMP), Maine, USA, and isolated a single cell by plating on agarose ESAW marine culture  
172 medium (Harrison *et al.* 1980). From this progenitor, we propagated ten replicate populations  
173 (“selection lines” hereafter) into 20 ml ESAW marine culture medium contained in 50 ml  
174 Cellstar polystyrene tissue culture flasks with breathable caps (Greiner Bio-One GmbH,  
175 Frickenhausen, Germany), which we gently agitated daily to keep cells in suspension. We  
176 assigned five replicates to the 16°C treatment and the other five to 31°C. These two temperatures  
177 were below and above the previously-recorded thermal optimum ( $T_{opt}$ ) of *T. pseudonana* (~26°C:  
178 Boyd *et al.* 2013), chosen so that the maximum growth rates ( $\mu_{max}$ ) at the two temperatures were  
179 roughly equal (~0.8 d<sup>-1</sup> at the start of the experiment). Selection lines were maintained in  
180 temperature-controlled growth chambers under a 14:10 light:dark cycle, illuminated at 110  $\mu\text{mol}$   
181 photons m<sup>-2</sup> s<sup>-1</sup> during the day. All lines were maintained in ESAW medium for ~50 generations  
182 at a dilution rate of 0.5 d<sup>-1</sup> (diluted daily), after which all cultures were transferred to L1 medium  
183 (Guillard & Hargraves 1993) due to poor culture health in ESAW. L1 was made using 43.465 g  
184 l<sup>-1</sup> artificial sea salt (Tropic Marin, Wartenberg, Germany), which yields a specific gravity of

185 1.025, similar to natural seawater. Upon switching culture media, we also altered the dilution  
186 regime, such that  $10^6$  cells (usually ~0.5-1.0 ml) were transferred to fresh medium every 4 d  
187 (with occasional deviations of  $\pm 1$  d). The selection lines required an additional ~50 generations  
188 to adjust to the new dilution regime before consistent growth rates and culture health were  
189 achieved. These changes led to a substantial improvement in culture health and maximum  
190 growth rates. Cell densities of all replicate cultures were determined at each transfer for the  
191 remainder of the experiment using a CASY particle counter (Schärfe System GmbH, Reutlingen,  
192 Germany), and average population growth rates for each propagation period determined by  
193 taking  $\log(N_t/N_0)/t$ , where  $N$  is the population density and  $t$  is time in days; growth assays in  
194 which cell densities were estimated daily were conducted periodically throughout the selection  
195 experiment, and did not at any point indicate that 4 d was long enough for populations to reach  
196 carrying capacity.

197

#### 198 Determination of temperature-dependent trait values

199 To evaluate evolutionary change in physiological traits, we conducted temperature-dependent  
200 (after ~350 generations) and nitrate-dependent (after ~400-450 generations) population growth  
201 assays on evolved selection lines. To derive temperature-dependent trait values, we fit a recent  
202 model proposed by Thomas *et al.* (2017), in which birth and death are both exponential functions  
203 of temperature. The resulting curve is a unimodal, left-skewed thermal reaction norm (TRN).

204 The double-exponential model (DE model, hereafter) is as follows:

205

$$206 \mu_{max} = b_1 e^{b_2 T} - d_1 e^{d_2 T} - d_0 \quad (1),$$

207



208 where  $\mu_{max}$  is the specific growth rate ( $d^{-1}$ ),  $T$ ,  $b_1$  and  $d_1$  are the pre-exponential constants for  
209 birth and death, respectively,  $b_2$  and  $d_2$  are the exponential rates of increase in both terms, and  $d_0$   
210 is the temperature-independent death rate. We derived  $T_{opt}$  analytically by taking the derivative of  
211 the thermal performance curve between 10°C and 34°C and setting it equal to zero (see  
212 Appendix A). Per-capita population growth as a function of external nitrate concentration can be  
213 described using the Monod equation (Monod 1949):

214

$$215 \quad \frac{1}{N} \frac{dN}{dt} = \frac{\mu_{max} a R}{\mu_{max} + a R} \quad (2),$$

216

217 where  $R$  is the resource (nitrate, in this case),  $\mu_{max}$  is the resource-saturated (maximum)  
218 population growth rate, and  $a$  is the nitrate affinity (the initial slope of the Monod curve). Note  
219 that this formulation directly incorporates the affinity  $a$ , rather than the traditional formulation  
220 with the half-saturation constant for growth,  $K$ . Affinity is a more useful parameter because it is  
221 more directly indicative of competitive ability (Healey 1980). The two parameters are related by  
222  $K = \mu_{max}/a$ .

223

224 *Temperature-dependent growth assays.* For temperature-dependent growth assays we first sub-  
225 cultured all selection lines and acclimated sub-cultures to ten temperatures spanning the thermal  
226 niche for ~12 generations. Approximately  $10^5$  cells from each acclimated culture were then  
227 propagated into fresh L1 medium, and each culture's density estimated daily at the acclimated  
228 temperature until reaching stationary phase (5-10 d, depending on the temperature). Light  
229 conditions were as above. Culture density was estimated daily at all temperatures  $\geq 16^\circ\text{C}$  by  
230 placing the polystyrene culture flask in a Shimadzu UV-2401PC spectrophotometer (Shimadzu

231 Corporation, Kyoto, Japan) and measuring Abs<sub>436</sub> (the wavelength corresponding to the  
232 absorbance maximum of chlorophyll *a*) (Neori *et al.* 1986); Fogging of culture flasks at  
233 temperatures <16°C prevented use of this method, so daily density estimates at 3 and 10°C were  
234 conducted using the CASY counter. We calculated exponential growth rates by fitting regression  
235 lines to log-transformed population densities over time. Single cultures of each selection line  
236 were assayed at each temperature, except those at 16 and 31°C, which were assayed in triplicate  
237 to facilitate direct statistical comparison of growth rates. This comparison serves as a “reciprocal  
238 transplant” experiment, a common approach to test for local adaptation (Kawecki and Ebert  
239 2004).

240

241 *Nitrate-dependent growth assays.* To determine if the nutrient-related traits changed as a result  
242 of adaptation to different temperatures, we estimated Monod growth curves for nitrate at 16 and  
243 31°C. In particular, we sought to determine whether temperature selection had caused  
244 evolutionary divergence in nitrogen affinities between lines from each temperature treatment  
245 when assayed at both selection temperatures, and whether this divergence corresponded to a  
246 growth-affinity tradeoff. All ten selection lines were assayed in triplicate at each selection  
247 temperature and at ten N concentrations ranging from 0 to 882  $\mu\text{mol l}^{-1}$  (the N concentration of  
248 undiluted L1 medium). Population growth rates were measured as above. Prior to the Monod  
249 assay, all assayed lines were acclimated to assay temperatures as above, followed by a 5 day N-  
250 starvation period in which cultures were kept in modified N-free L1 medium.

251

252 *Model fitting, trait estimation and statistical analysis.*

253 We conducted all statistical analyses using R statistical programming language, version 3.3.2.

254 We fit Equation (1) to temperature-dependent growth data using the “mle2()” function from the  
255 “bbmle” package (Bolker 2016). To fit Equation (2) to nutrient-dependent growth data, we used  
256 weighted, nonlinear least squares regression, due to high uncertainty in some growth rate  
257 estimated for these assays; these analyses were carried out using the “gnls” function from the  
258 “nlme” package (Pinheiro *et al.* 2017), with a fixed variance function (“varFixed()”). Estimation  
259 of uncertainty in parameter estimates was identical to the nonparametric, residual bootstrapping  
260 procedure described in Listmann *et al.* (2016).

261 We compared bootstrapped TRN trait distributions and statistically fit means and  
262 variances of nitrate affinity using simple linear models with selection line as the only predictor  
263 (see Supplemental materials section S1.1). We compared  $\mu_{\max}$  and nitrate affinities at the  
264 selection temperatures within and among selection lines (“reciprocal transplant” approach) using  
265 linear models with selection line and assay temperature as predictors (see Supplemental materials  
266 section S1.2). We did not fit an interaction term due to insufficient degrees of freedom.  
267 Bootstrapped nitrate affinity ( $a_{\text{NO}_3}$ ) estimates were log-normally distributed and were log-  
268 transformed for statistical fits and comparisons (i.e. all affinity estimates were entered as  
269  $\exp[\ln(a)]$  for statistical fits, and 95% CI are for  $\ln(a)$ ).

270

## 271 **Results**

272 *Evolutionary change in thermal reaction norms.* The growth for 350 generations at two different  
273 temperatures, below and above the temperature optimum for *T. pseudonana* (16 and 31°C), led  
274 to a significant divergence of the thermal reaction norms (Figure 1).  $T_{\text{opt}}$  was 2.1°C higher, on  
275 average, in selection lines evolved at 31°C than in those evolved at 16°C (Figure 2A; see  
276 standardized linear model effects with 95% CI for individual replicates in Supplemental

277 Materials Figure S1), as was the maximum growth rate at  $T_{opt}$  ( $\mu_{opt}$ ) (Figure 2B; SM Figure S1).  
278  $CT_{max}$  was also higher in 31°C-selected lines than in 16°C-selected lines, with one exception  
279 (replicate line 31.5). However, divergence in  $CT_{max}$  was smaller than for  $T_{opt}$ ,  $<1^\circ\text{C}$  on average  
280 (Figure 2C; SM Figure S1).

281 A reciprocal transplant comparison between temperature treatments revealed that all  
282 selection lines from each treatment had higher maximum growth rates ( $\mu_{max}$ ) in their “home”  
283 temperature environments than in “away” environments, with the exception of replicate line  
284 16.1; “local” lines also had higher growth rates than “foreign” lines in all cases (Figure 2D; SM  
285 Figure S1). Taken together, these results are the signature of local adaptation to temperature  
286 (Kawecki & Ebert 2004; Blanquart *et al.* 2013). While  $\mu_{max}$  estimates differed slightly between  
287 350 and 450 generations (measured for TRN and Monod assays, respectively), differences were  
288 not directionally consistent across selection lines, and the overall pattern of local adaptation  
289 persisted (Figure 5A).

290 The peaks of the TRN of 31°C-selected lines appeared sharper, and the left tails more  
291 deeply concave-up than those of 16°C -selected lines, both for the parametric (Fig. 1) and  
292 nonparametric (Fig. S5) TRN. These observations, combined with the extremely narrow range of  
293  $CT_{max}$  between the two selection regimes, led us to hypothesize that  $CT_{max}$  is less evolutionarily  
294 labile than  $T_{opt}$ , resulting in greater skew in TRN of 31°C-selected lines, rather than a simple  
295 rightward shift of the TRN along the temperature axis. The difficulty in reliably estimating  $CT_{min}$   
296 prevented statistical comparisons of  $CT_{min}$  and of thermal niche width among selection lines, and  
297 also prevented estimation of skewness. However, we determined the distance between  $T_{opt}$  and  
298  $CT_{max}$  for all bootstrapped thermal reaction norms; ideally, this distance would be scaled by  
299 thermal niche width, but absence of reliable thermal niche width estimates prevented scaling.

300 The distance between  $T_{\text{opt}}$  and  $CT_{\text{max}}$  (“upper tail length”) was smaller in 31°C-selected lines than  
301 in 16°C-selected lines (Figure 3A; SM Figure S2), suggesting that the change in  $T_{\text{opt}}$  was greater  
302 than the change in  $CT_{\text{max}}$  at one or possibly both selection temperatures. We also determined the  
303 “sharpness” of the TRN peaks by taking the second derivative of the TRN with respect to  
304 temperature at  $T_{\text{opt}}$  (“Peak sharpness” [Figure 3B] is the negative of this number), and the  
305 upward-concavity below  $T_{\text{opt}}$  by comparing the maxima in the second derivative across  $0 \leq T \leq$   
306  $T_{\text{opt}}$ . We estimated the inflection point of each TRN by setting  $\frac{\partial^2 \mu_{\text{max}}}{\partial T^2} = 0$  and solving for  $T$   
307 within the range  $0 \leq T \leq T_{\text{opt}}$ . 31°C-selected lines had sharper peaks at  $T_{\text{opt}}$ , were more deeply  
308 concave-up below  $T_{\text{opt}}$ , and had inflection points at higher temperatures than 16°C-selected lines  
309 (Figure 1; Figure 3B-3D; SM Figure S2), suggesting greater negative skewness. The area under  
310 each TRN between 0°C and  $CT_{\text{max}}$  ( $^{\circ}\text{C d}^{-1}$ ), estimated using the “auc()” function in the “flux” R  
311 package (Jurasinski *et al.* 2014), was smaller in 31°C lines than in 16°C lines in four out of five  
312 cases; AUC for replicate line 16.4 was comparable to those for 31°C-selected lines (Figure 3E;  
313 Figure S2).

314 Adaptive divergence in  $\mu_{\text{max}}$  at selection temperatures was likely driven mostly by  
315 evolution of 31°C-selected lines. Maximum growth rates in the 16°C-selected lines first  
316 increased between 150 and 350 generations, then declined between 350 and 500 generations,  
317 yielding a net change near zero. 31°C-selected lines, however, first increased  $\mu_{\text{max}}$  rapidly for  
318 ~300 generations, after which little change occurred (Figure S3). Between 450 and 500  
319 generations, all five 31°C-selected lines again appear to increase  $\mu_{\text{max}}$  (Figure S3), though  
320 drawing inferences from this short timeframe may be premature.

321

322 *Evolution of competitive ability for nitrate.* Temperature selection led to evolutionary change in

323 traits beyond the thermal reaction norm for growth rate. Specifically, nitrate growth affinities,  
324 derived from nitrate-dependent growth (Monod) assays (Figure 4), diverged between  
325 temperature treatments, leading to changes in competitive ability for nitrate in both “home” and  
326 “away” environments. While all selection lines remained locally adapted to their selection  
327 temperatures in terms of their maximum growth rates ( $\mu_{\max}$ ) after 450 generations (Figure 5A),  
328 variation in nitrate affinity ( $a_{\text{NO}_3}$ ) was more consistent between assay temperatures than between  
329 selection groups;  $a_{\text{NO}_3}$  was higher for all but three (replicate lines 16.1, 31.1, 31.5) when assayed  
330 at 31°C, regardless of selection temperature (Figure 5B). Three out of the five 31°C-selected  
331 lines (replicate lines 31.2, 31.3, 31.5) had marginally higher  $a_{\text{NO}_3}$  than all of the 16°C-selected  
332 lines when assayed at 16°C, with one (31.1) dramatically higher (Figure 5B). However, at 31°C,  
333 two 16°C-selected lines (16.3, 16.4) and two 31°C-selected lines (31.2, 31.3) had  $a_{\text{NO}_3} > 0.05 \text{ l } \mu\text{mol}^{-1} \text{ d}^{-1}$   
334  $\mu\text{mol}^{-1} \text{ d}^{-1}$ , while the rest were nearly indistinguishable, with affinities around  $0.03 \text{ l } \mu\text{mol}^{-1} \text{ d}^{-1}$   
335 (Figure 5B). The trade-off between the maximum growth rate and nitrate affinity was apparent in  
336 the 16°C-selected lines but, interestingly, was weak or absent in the 31°C-selected lines, with  
337 replicates pooled across assay temperatures (Fig. S4).

338

## 339 **Discussion**

340 Evidence that phytoplankton can evolve rapidly in response to environmental change is  
341 mounting (Collins & Bell 2004; Hutchins *et al.* 2015; Listmann *et al.* 2016), but the response to a  
342 single, directional selection pressure can be multifaceted (Low-Décarie *et al.* 2013; Schlüter *et al.*  
343 *et al.* 2014; Hutchins *et al.* 2015). We showed that adaptation to different temperatures not only  
344 changes the growth rate at the selection temperature but significantly alters the shape of the  
345 whole thermal reaction norm (TRN), a function-valued trait. The changes included shifts of

346 critical temperature traits (e.g.  $T_{\text{opt}}$  and  $CT_{\text{max}}$ ), changes in the slope and curvature of the TRN at,  
347 below, and above  $T_{\text{opt}}$ , and changes in the total area under the TRN (“AUC”, hereafter).  
348 Adaptation to high temperature resulted in a growth rate decline at low temperatures (a  
349 performance trade-off). Moreover, traits not directly associated with the TRN for population  
350 growth, such as competitive abilities for nutrients, changed in response to temperature selection  
351 as well, possibly due to pleiotropic effects (Elena & Lenski 2003) or resource allocation or  
352 acquisition tradeoffs (Gilchrist 1995; Angilletta *et al.* 2003).

353         Selection at 31°C, well above the previously recorded  $T_{\text{opt}}$  for *T. pseudonana* (Boyd *et al.*  
354 2013), led to a shift in  $T_{\text{opt}}$  of  $\sim 2$  °C, on average. Concurrent with this shift, the maximum growth  
355 rate at  $T_{\text{opt}}$  ( $\mu_{\text{opt}}$ ) increased by  $\sim 0.1$  d<sup>-1</sup> (“vertical shift”: Izem & Kingsolver 2005) and all strains  
356 but one (replicate line 16.1) met both the “local versus foreign” and “home versus away” criteria  
357 for demonstrating local adaptation at both 16°C and 31°C (Kawecki & Ebert 2004; Blanquart *et*  
358 *al.* 2013). We are unsure what caused the decline in growth rate of the 16°C-selected lines after  
359  $\sim 350$  generations (Figure S3); a reduction in growth rates in evolution experiments was observed  
360 previously and could also be attributed to the accumulating cellular damage associated with the  
361 initial evolution of faster growth rate (“Prodigal Son” dynamics) (Collins 2016). A second  
362 possible explanation is clonal interference, though determination of relative clone frequencies  
363 within a population would require identification and quantification of genetic markers (Gerrish &  
364 Lenski 1998). Despite this reduction in fitness, however, local adaptation was still apparent in  
365 16°C-selected lines at 450 generations (Figure 5).

366         The results presented here suggest that the variation in *T. pseudonana*’s TRN caused by  
367 thermal adaptation led to (or was driven by) a number of trade-offs. First, while we could not  
368 precisely estimate  $CT_{\text{min}}$  or the thermal niche width, the performance trade-off resulting from

369 selection at 16°C versus at 31°C, combined with changes in  $T_{\text{opt}}$ , strongly suggest some  
370 horizontal shift in the TRN (Izem & Kingsolver 2005; Kingsolver *et al.* 2009), as previously  
371 observed in bacteriophages (Knies *et al.* 2006) and the marine coccolithophore *Emiliana huxleyi*  
372 (Listmann *et al.* 2016). In addition, both temperature “generalist-specialist” and resource  
373 allocation trade-offs were apparent (Gilchrist 1995; Angilletta *et al.* 2003). The higher, sharper  
374 peaks and compressed upper tails in the TRN of 31°C-selected lines, accompanied by a reduction  
375 in fitness at 16°C, suggest greater specialization for growth at high temperatures in 31°C-  
376 selected lines and less specialization in general in 16°C-selected lines. However, the reduction in  
377 area under the TRN curve (“AUC”) in 31°C-selected lines suggests the existence of an  
378 acquisition or allocation trade-off as well. Gilchrist (1995) predicted that, absent a major shift in  
379 resource acquisition or allocation toward or away from reproduction, the AUC should remain  
380 constant—in other words, the derivative of the function may change, but its integral does not  
381 (Gilchrist 1995; Angilletta *et al.* 2003). We found that, assuming a hard cutoff in positive  
382 population growth at 0°C, 31°C-selected lines had a lower total AUC than four out of five 16°C-  
383 selected lines (Figure 3E), despite having higher maximum growth rates at and above  $T_{\text{opt}}$ .

384 We propose a modification to Equation (1) that leads to a prediction of greater  
385 temperature specialization in high-temperature adapted strains while also allowing for an  
386 allocation trade-off in which enhanced enzyme repair machinery at high temperatures comes at a  
387 cost to reproduction at temperatures below  $T_{\text{opt}}$ . In high-temperature adapted species, the  
388 thermodynamically predicted temperature of maximum enzyme stability falls well below the  
389 statistically fit  $T_{\text{opt}}$  (Ratkowsky *et al.* 2005; Corkrey *et al.* 2014), suggesting that it is rapid repair,  
390 rather than enhanced stability of enzymes that allows for positive growth at very high  
391 temperatures. The trade-off inherent in the following model simply assumes a lack of plasticity



392 in resource allocation to enzyme repair at high temperatures versus reproduction across  
393 temperatures (Angiletta *et al.* 2003).

$$394 \quad f(T) = (1/q) b_1 e^{b_2 T} - (1/p) d_1 e^{d_2 T} - d_0, \quad (3)$$

$$395 \quad q = q_0 + q_1 p \quad (4)$$

396 Here, the exponential mortality term is weighted inversely by  $p$ , which represents investment in  
397 protection from heat-induced denaturation of enzymes (or the induction of repair enzyme  
398 activity);  $q$  is the resource content of a cell (quota), which is linearly related to  $p$ . Thus, as  
399 investment in protection and repair increases, temperature-dependent mortality decreases.  
400 However, temperature-dependent birth is also negatively affected as resources are diverted from  
401 reproduction and allocated to protection. The modified DE model can produce changes in the  
402 curvature of the TRN similar to those observed in the *T. pseudonana* selection experiment  
403 (Figure 6). The model predicts that peak sharpness at  $T_{\text{opt}}$ , upward concavity below  $T_{\text{opt}}$ , and the  
404 location of the inflection point are all positive, saturating functions of  $p$  (Figure S12A-D).

405 There are two observed results that this model does not predict, however. First, the model  
406 predicts that upper tail length is a positive, saturating function of  $p$  (Figure S7). In contrast, the  
407 upper tails of our experimentally derived thermal reaction norms were more compressed in  
408 31°C-selected lines, compared to 16°C-selected lines (Figure 3A). Second, in experiments, the  
409 change in  $CT_{\text{max}}$  was smaller than that in  $T_{\text{opt}}$ —these two discrepancies are likely not independent  
410 of one another. Evolution of  $CT_{\text{max}}$  may thus be constrained by evolutionary barriers not  
411 incorporated in the model. Although evolution of  $CT_{\text{max}}$  in response to temperature selection has  
412 been observed in the bacterium *Escherichia coli* (Mongold *et al.* 1996) and in the marine  
413 coccolithophore *Emiliana huxleyi* (Listmann *et al.* 2016), the small changes in  $CT_{\text{max}}$  relative to  
414  $T_{\text{opt}}$  in this study suggest that, at least in *T. pseudonana*,  $T_{\text{opt}}$  is more evolutionarily labile than

415  $CT_{\max}$ , as suggested by Araújo *et al.* (2013)—although the mere existence of vast diversity in  
416  $CT_{\max}$  in nature (see, e.g., Corkrey *et al.* 2014) indicates that such constraints are not  
417 evolutionarily insurmountable. However, on timescales relevant to the current rate of increase of  
418 global sea surface temperature, constraints on evolution of a higher  $CT_{\max}$  may cause regional  
419 extinctions, contributing to diversity loss, especially at low latitudes (Thomas *et al.* 2012).

420 An increase in the maximum growth rate (fitness) is the most predictable response to the  
421 temperature selection environment, but the physiological causes and ecological consequences of  
422 that change can be indirect and far-reaching (Schlüter *et al.* 2014; Padfield *et al.* 2016). In the  
423 presence of a growth rate-competitive ability tradeoff, for example, selection for rapid growth  
424 (high  $\mu_{\max}$ ) in nutrient-replete conditions (as was the case here) may lead to a decline in  
425 competitive ability (suggested here by a decline in  $a_{\text{NO}_3}$ ), though as we observed, this tradeoff  
426 may be escapable. Whether or not a tradeoff is observed may depend on the affected genes and  
427 the mechanisms by which a population achieves thermal adaptation. Given the diversity in  $a_{\text{NO}_3}$   
428 and among selection lines within a single selection and assay temperature group, adaptation to  
429 temperature was possibly driven by changes to a distinct combination of loci in each selection  
430 line—mutations in some lines were relevant to  $\text{NO}_3$  uptake and metabolism (e.g. genes for cell  
431 membrane  $\text{NO}_3$  transporters,  $\text{NO}_3$  reductases and plastid-localized nitrite transporters) (Armbrust  
432 *et al.* 2004), while others may have affected other systems, such as photosynthesis or  
433 reproductive machinery (Padfield *et al.* 2016).

434 In the absence of nutrient limitation (and thus any selection for enhanced competitive  
435 ability), selection likely favors high  $\mu_{\max}$  over high nitrate affinity. However, thermal adaptation  
436 in the ocean would occur under nitrogen limitation in most cases, at least in the temperate ocean  
437 where *T. pseudonana* is commonly found (Fong 2008), and may thus produce competitive

438 abilities quite different from those we observed here. While we acknowledge the challenges  
439 inherent in combined temperature-nutrient selection experiments (e.g. longer generation times  
440 and high mortality due to failure to meet minimum nitrate quotas), we suggest that future  
441 temperature selection experiments must account for nutrient limitation to reflect realistic climate  
442 change scenarios in natural systems.

443 Evolution experiments are essential to enhancing our understanding of the effects of  
444 climate change on marine and freshwater food webs. Arguably, phytoplankton are among the  
445 highest-payoff organisms upon which we can conduct evolution experiments; they offer a unique  
446 combination of potential for rapid evolutionary responses to environmental change, tractability  
447 as experimental subjects, and global ecological importance (Reusch & Boyd 2013). Eco-  
448 evolutionary responses to changes in temperature, ocean acidity, nutrient limitation and other  
449 environmental factors are complex, and are made more complex by interactions among these  
450 factors. Single-stressor evolution experiments are a valuable first step, but future evolution  
451 experiments must account for interactive effects of multiple stressors (e.g. temperature and  
452 nitrate limitation).

453

#### 454 **Acknowledgements**

455 We thank Colin Kremer for statistical consultation and Mridul Thomas for culturing tips and  
456 conceptual input. This work would have been impossible without the support of our technicians  
457 at Kellogg Biological Station, Allyson Hutchins and Pamela Woodruff. DRO was supported by  
458 the National Science Foundation Graduate Research Fellowship, and by the Kellogg Biological  
459 Station Undergraduate Mentor Fellowship. This work was funded by National Science  
460 Foundation Grants OCE [0928819](https://doi.org/10.1101/167817) and 1638958 to EL and CAK.

461

462 FIGURES

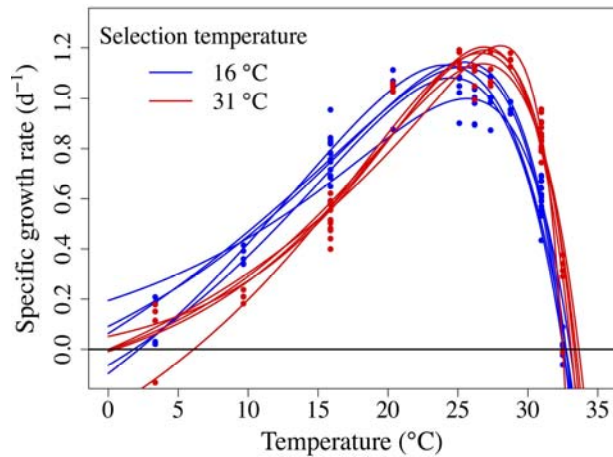

463  
464 **Figure 1** Thermal reaction norms for per-capita population growth of 10 *T. pseudonana*  
465 populations after 350 generations of experimental selection, five at 16°C (blue) and five at 31°C  
466 (red). Curves were fit using maximum likelihood estimation.  
467  
468

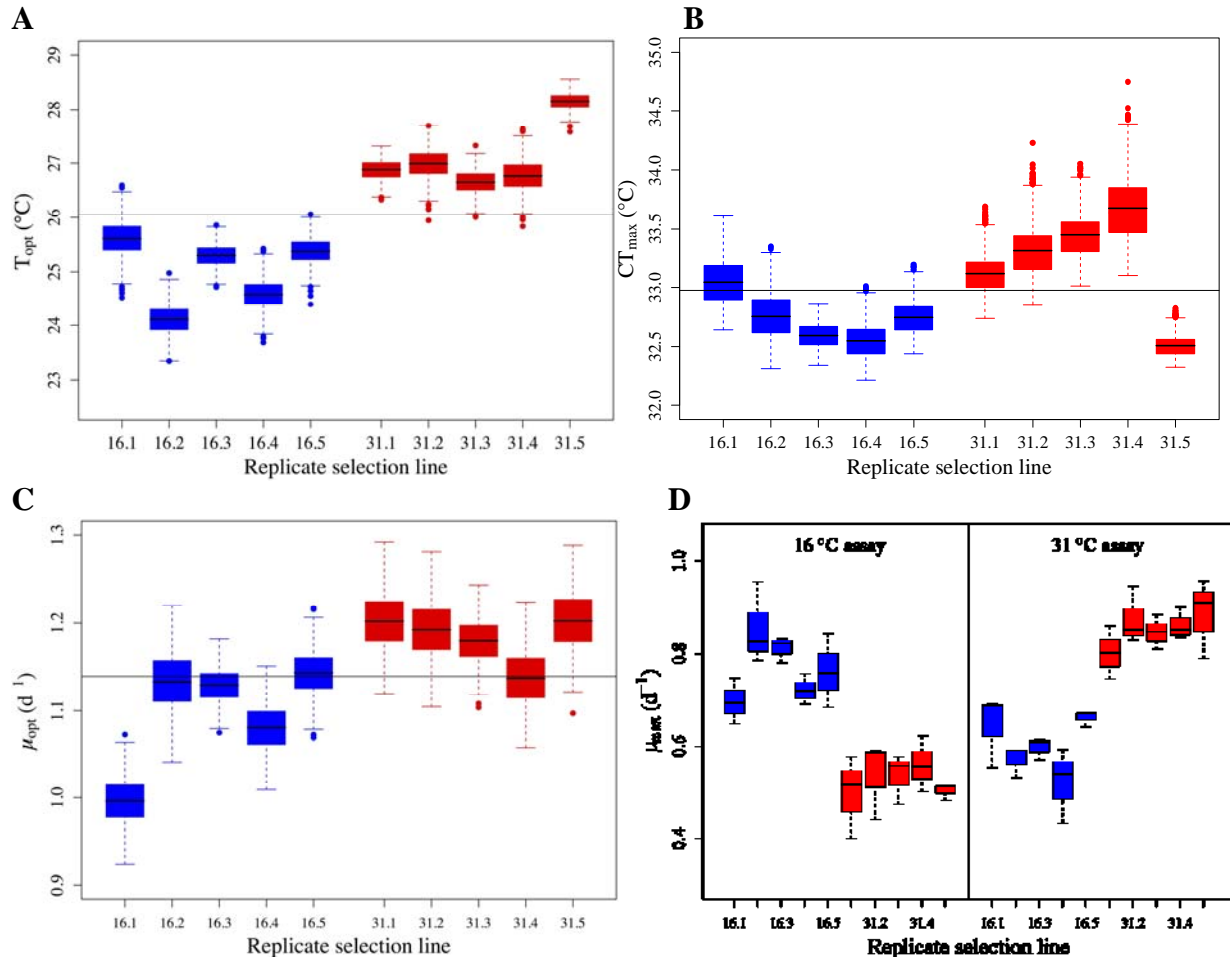

469  
470 **Figure 2** (A) Box-and-whisker plots of bootstrap  $T_{opt}$  estimates ( $n = 1000$ ). Boxes span the first-  
471 third quartiles; dots are outliers; black lines inside boxes represent  $T_{opt}$  estimates from the DE fits  
472 in panel A. (B) Box-and-whisker plots of  $CT_{max}$  bootstrap distributions. Symbols are as in panel  
473 B. (C) Box-and-whisker plots of  $\mu_{max}$  bootstrap distributions. Symbols are as in panel B. (D)  
474  
475

476 Box-and-whisker plots of  $\mu_{\max}$  in the reciprocal transplant scenario (both selection groups  
477 assayed at both selection temperatures). These assays were conducted in triplicate (no  
478 bootstrapping). In panel D, black horizontal lines are median values for each selection line. In  
479 panels B and C, the thin, horizontal line across the whole panel is the grand mean across all  
480 bootstrap parameter values, to aid in visualization of trait differences among selection lines.  
481  
482  
483

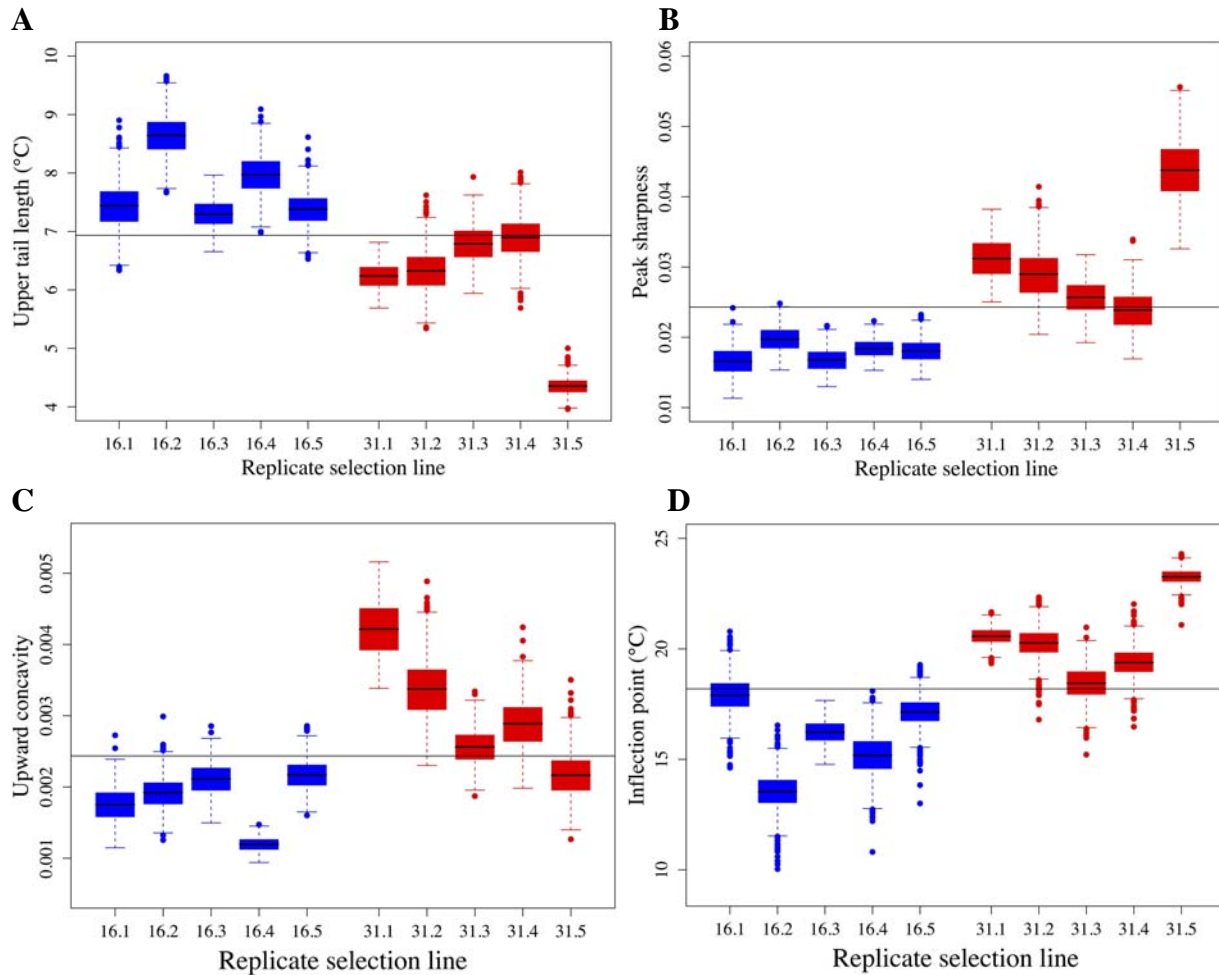

484  
485

486  
487  
488

**E**

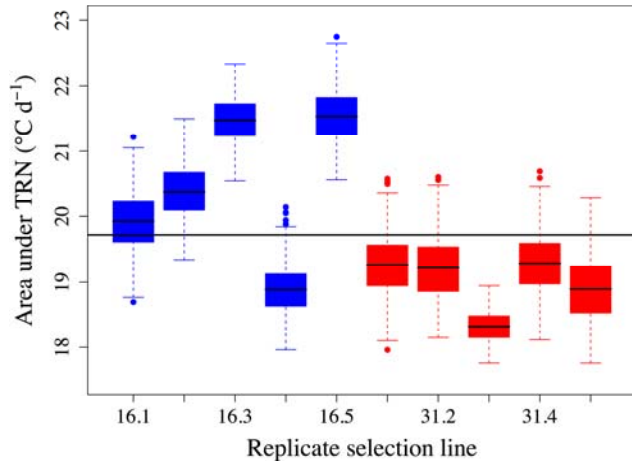

489  
 490 **Figure 3** (A) Upper tail lengths ( $CT_{\max} - T_{\text{opt}}$ ) derived numerically from bootstrap DE curves ( $n$   
 491 = 1000). (B) Peak sharpness of bootstrap DE curves. Sharpness is calculated as the negative of  
 492 the second derivative of the DE curve with respect to temperature at  $T_{\text{opt}}$  (larger values represent  
 493 more negative gradients). (C) Upward concavity of bootstrap DE curves below  $T_{\text{opt}}$ , calculated as  
 494 the maximum of the second derivative across  $0 \leq T \leq T_{\text{opt}}$ . (D) The inflection point below  $T_{\text{opt}}$ ,  
 495 where  $\frac{\partial^2 \mu_{\max}}{\partial T^2} = 0$ . All symbols are as in Figure 1 B,C. (E) Area under the TRN (AUC) ( $^{\circ}\text{C d}^{-1}$ ),  
 496 determined by taking the integral the fit TRN between  $0^{\circ}\text{C}$  and  $CT_{\max}$ .

497  
 498  
 499

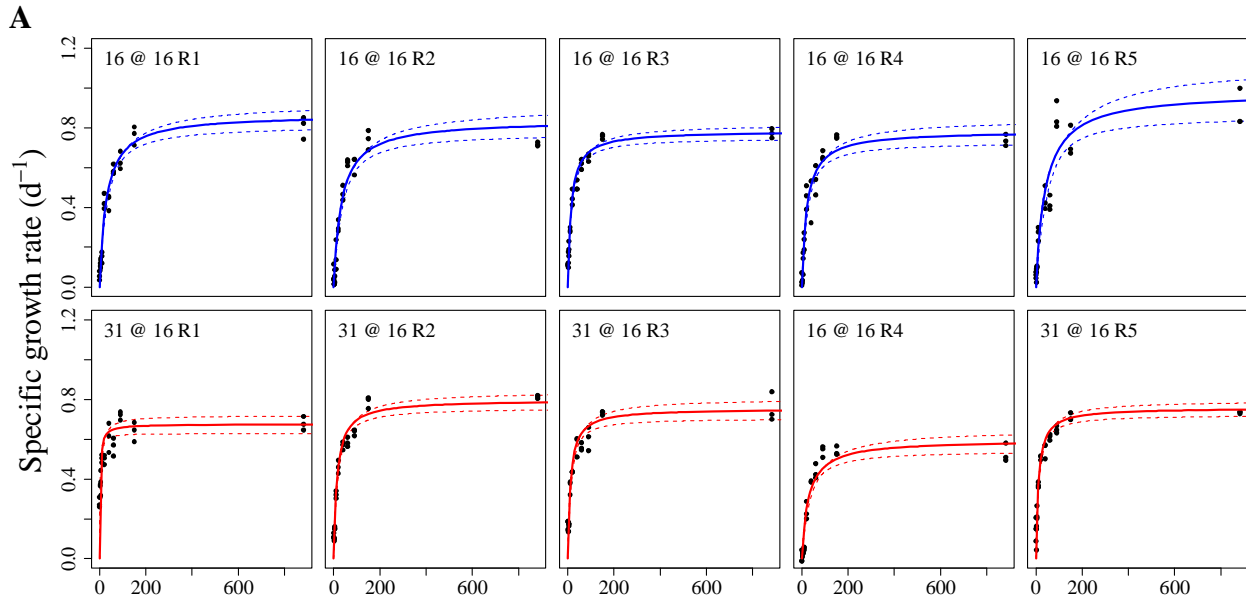

500  
 501

**B**

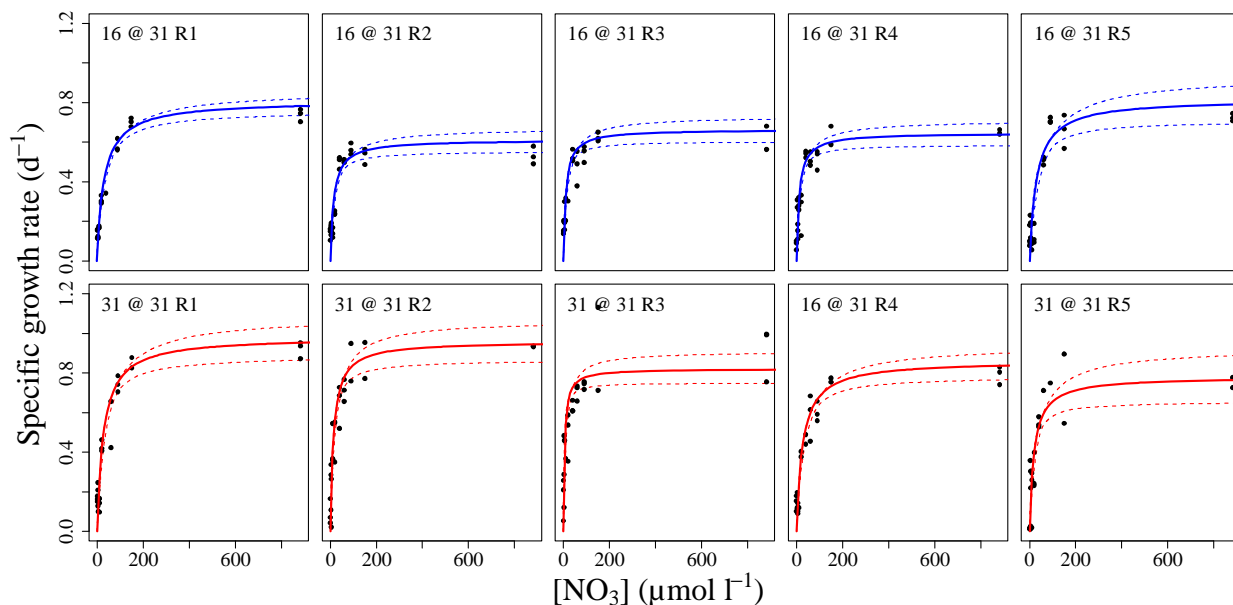

502  
503 **Figure 4** Nitrate-dependent growth (Monod) assays at 16°C (A) and 31°C (B). Curves were fit to  
504 *T. pseudonana* exponential growth rates at ambient  $\text{NO}_3$  concentrations ranging from 0 to 882  
505  $\mu\text{mol } \Gamma^{-1}$  (the  $\text{NO}_3$  concentration in unaltered L1 marine medium). Monod parameters ( $a_{\text{NO}_3}$  and  
506  $\mu_{\text{max}}$ ) were estimated using generalized leased squares.

507  
508  
509  
510  
511

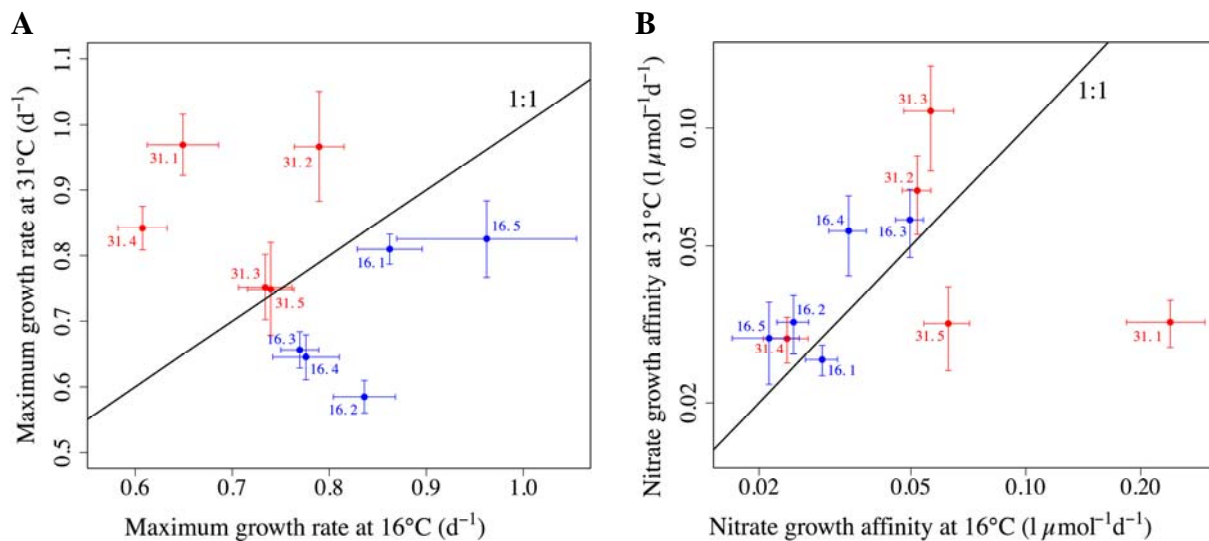

512  
513 **Figure 5** Nitrate-dependent growth (Monod) kinetic parameters. (A) *T. pseudonana* maximum  
514 specific growth rates ( $\mu_{\text{max}}$ ) for 31°C- and 16°C-selected lines (red and blue, respectively)  
515 assayed at 31°C versus at 16°C. (B) Nitrate growth affinity ( $a_{\text{NO}_3}$ ); colors and assay temperatures  
516 are as in panel A. Note that the y-axis in panel B is on a log scale. Black diagonals are 1:1 lines.  
517 Bars are  $\pm 1$  SE.

518  
519

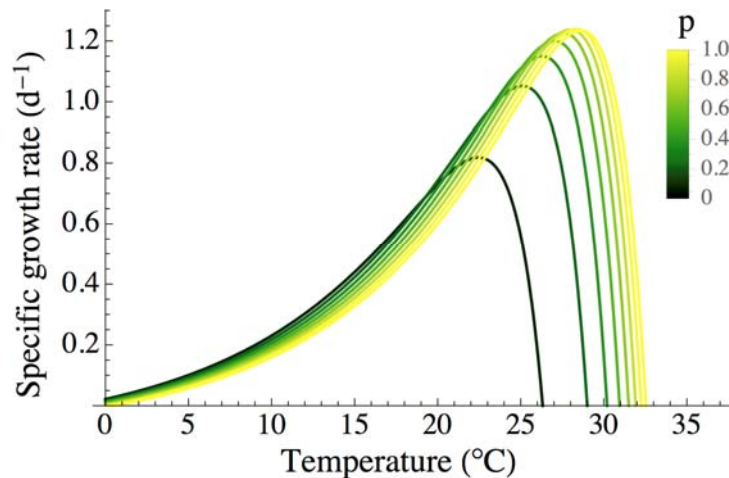

520  
521 **Figure 6** The modified double-exponential model with protection ( $p$ ) ranging from 0.1 to 1.  
522 Other parameter values are as follows:  $b_1 = 0.124$ ,  $b_2 = 0.1$ ,  $d_0 = 0.1$ ,  $d_1 = 3.059 \times 10^{-7}$ ,  $d_2 = 0.5$ .

523  
524  
525 REFERENCES

- 526  
527 Angilletta, M. J.; Wilson, R. S., Navas, C. A., & James, R. S. Tradeoffs and the evolution of  
528 thermal reaction norms. *Trends Ecol. Evol.*, 18, 234-240.  
529 Araújo, M., & Ferri-Yáñez, F. (2013). Heat freezes niche evolution. *Ecol. Lett.*, 16, 1206–1219.  
530 Armbrust, E. V., Berges, J. a, Bowler, C., Green, B. R., Martinez, D., Putnam, N. H., *et al.*  
531 (2004). The genome of the diatom *Thalassiosira pseudonana*: ecology, evolution, and  
532 metabolism. *Science*, 306, 79–86.  
533 Baker, K. G., Robinson, C. M., Radford, D. T., McInnes, A. S., Evenhuis, C., & Doblin, M. A.  
534 (2016). Thermal performance curves of functional traits aid understanding of thermally  
535 induced changes in diatom-mediated biogeochemical fluxes. *Front. Mar. Sci.*, 3, 1–14.  
536 Bell, G. (2013). Evolutionary rescue and the limits of adaptation. *Philos. Trans. R. Soc. Lond. B*  
537 *Biol. Sci.*, 368, 20120080.  
538 Bennett, A. F., & Lenski, R. E. (1993). Evolutionary adaptation to temperature II. Thermal  
539 niches of experimental lines of *Escherichia coli*. *Evolution*, 47, 1-12.  
540 Blanquart, F., Kaltz, O., Nuismer, S. L. S., & Gandon, S. (2013). A practical guide to measuring  
541 local adaptation. *Ecol. Lett.*, 16, 1195–205.  
542 Bolker, B., & R Core Team (2017). *bbmle: tools for general maximum likelihood estimation*. R  
543 package version 1.0.19, <https://cran.r-project.org/web/packages/bbmle/index.html>.  
544 Boyce, D. G., Lewis, M. R., & Worm, B. (2010). Global phytoplankton decline over the past  
545 century. *Nature*, 466, 591–596.  
546 Boyd, P. W., Rynearson, T. A., Armstrong, E. A., Fu, F., Hayashi, K., Hu, Z., *et al.* (2013).  
547 Marine phytoplankton temperature versus growth responses from polar to tropical waters –  
548 outcome of a scientific community-wide study, *PLoS One*, 8, e63091.  
549 Bradford, M. A. (2013). Thermal adaptation of decomposer communities in warming soils.  
550 *Frontiers Microbiol.*, 4, 1-16.  
551 Collins, S. (2016). Growth rate evolution in improved environments under Prodigal Son  
552 dynamics. *Evol. Appl.*, 9, 1179-1188.  
553 Collins, S., & Bell, G. (2004). Phenotypic consequences of 1,000 generations of selection at  
554 elevated CO<sub>2</sub> in a green alga. *Nature*, 431, 566–569.



- 555 Corkrey, R., McMeekin, T. a, Bowman, J. P., Ratkowsky, D. a, Olley, J., & Ross, T. (2014).  
556 Protein thermodynamics can be predicted directly from biological growth rates. *PLoS One*,  
557 9, e96100.
- 558 Crawford, K. J., Raven, J. A., Wheeler, G. L., Baxter, E. J., & Joint, I. (2011). The response of  
559 *Thalassiosira pseudonana* to long-term exposure to increased CO<sub>2</sub> and decreased pH. *PLoS*  
560 *One*, 6, e26695.
- 561 Elena, S. F., & Lenski, R. E. (2003). Evolution experiments with microorganisms: the dynamics  
562 and genetic bases of adaptation. *Nature Rev. Genet.*, 4, 457–469.
- 563 Field, C. B., Behrenfeld, M. J., Randerson, J. T., & Falkowski, P. G. (1998). Primary production  
564 of the biosphere: integrating terrestrial and oceanic components. *Science*, 281, 237–240.
- 565 Fong, P. (2008). Macroalgal-dominated ecosystems. In: *Nitrogen in the Marine Environment*,  
566 Second edition. {[eds.] [Capone, D. G., Bronk, D. A., Mulholland, M. R., & Carpenter, E.  
567 J.]} Academic Press (Elsevier), Cambridge, MA, USA, pp. 917-947.
- 568 Gerrish, P. J., & Lenski, R. E. (1998). The fate of competing beneficial mutations in an asexual  
569 population. *Genetica*, 102–103, 127–44.
- 570 Gilchrist, G.W. (1995). Specialists and generalists in changing environments. I. Fitness  
571 landscapes of thermal sensitivity. *Am. Nat.*, 146, 252–270.
- 572 Gomulkiewicz, R., & Holt, R. D. 1995. When does evolution by natural selection prevent  
573 extinction? *Evolution*, 49, 201–207.
- 574 Grover, J. P. (1997). *Resource competition*. Chapman & Hall, London, UK, pp. 1-351.
- 575 Grover, J. P. (1991). Resource competition in a variable environment: phytoplankton growing  
576 according to the variable-internal-stores model. *Am. Nat.*, 138, 811–835.
- 577 Guillard, R., & Hargraves, P. (1993). *Stichochrysis immobilis* is a diatom, not a chrysophyte.  
578 *Phycologia*, 32, 234–236.
- 579 Harrison, P., Waters, R., & Taylor, F. (1980). A broad spectrum artificial seawater medium for  
580 coastal and open ocean phytoplankton. *J. Phycol.*, 16, 28–35.
- 581 Healey, F. P. (1980). Slope of the Monod equation as an indicator of advantage in nutrient  
582 competition. *Microb. Ecol.*, 5, 281–286.
- 583 Hoffmann, A. A. & C. M. Sgrò. (2011). Climate change and evolutionary adaptation. *Nature*,  
584 470, 479-485.
- 585 Hutchins, D. A., Walworth, N. G., Webb, E. A., Saito, M. A., Moran, D., Mcilvin, M. R., *et al.*  
586 (2015). Irreversibly increased nitrogen fixation in *Trichodesmium* experimentally adapted to  
587 elevated carbon dioxide. *Nature Commun.*, 6, 8155.
- 588 Izem, R., & Kingsolver, J. G. (2005). Variation in continuous reaction norms: quantifying  
589 directions of biological interest. *Am. Nat.*, 166, 277–289.
- 590 Jin, P., Gao, K., & Beardall, J. (2013). Evolutionary responses of a coccolithophorid  
591 *Gephyrocapsa oceanica* to ocean acidification. *Evolution*, 67, 1869–1878.
- 592 Jurasinski, G., Koebisch, F., Guenther, A., & Beetz, S. (2014). *flux: Flux rate calculation from*  
593 *dynamic closed chamber measurements*. R package version 0.3-0. GNU General Public  
594 License GPL-2.
- 595 Kawecki, T. J., & Ebert, D. (2004). Conceptual issues in local adaptation. *Ecol. Lett.*, 7, 1225–  
596 Kingsolver, J. G., Gomulkiewicz, R., & Carter, P. A. (2001). Variation, selection and evolution  
597 of function-valued traits. *Genetica*, 112–113, 87–104.
- 598 Kingsolver, J. G. (2009). The well-temperated biologist. *Am. Nat.*, 174, 755–768.
- 599 Klausmeier, C. A., Litchman, E., Daufresne, T., & Levin, S. A. (2004). Optimal nitrogen-to-  
600 phosphorus stoichiometry of phytoplankton. *Nature*, 429, 171–174.

- 601 Knies, J. L., Izem, R., Supler, K. L., Kingsolver, J. G., & Burch, C. L. (2006). The genetic basis  
602 of thermal reaction norm evolution in lab and natural phage populations. *PLoS Biology*, 4,  
603 1257-1264.
- 604 Kutcherov, D. (2016). Thermal reaction norms can surmount evolutionary constraints:  
605 comparative evidence across leaf beetle species. *Ecol. Evol.*, 6, 4670–4683.
- 606 Listmann, L., LeRoch, M., Schlüter, L., Thomas, M. K., & Reusch, T. B. H. (2016). Swift  
607 thermal reaction norm evolution in a key marine phytoplankton species. *Evol. Appl.*, 9,  
608 1156–1164.
- 609 Litchman, E., Edwards, K., Klausmeier, C. A., & Thomas, M. (2012). Phytoplankton niches,  
610 traits and eco-evolutionary responses to global environmental change. *Mar. Ecol. Prog.  
611 Ser.*, 470, 235–248.
- 612 Litchman, E., & Klausmeier, C. A. (2001). Competition of phytoplankton under fluctuating light.  
613 *Am. Nat.*, 157, 170–187.
- 614 Litchman, E., Klausmeier, C. A., Schofield, O. M., & Falkowski, P. G. (2007). The role of  
615 functional traits and tradeoffs in structuring phytoplankton communities: Scaling from  
616 cellular to ecosystem level. *Ecol. Lett.*, 10, 1170–1181.
- 617 Lohbeck, K. T., Riebesell, U., & Reusch, T. B. H. (2012). Adaptive evolution of a key  
618 phytoplankton species to ocean acidification. *Nature Geosci.*, 5(5), 346–351.
- 619 Low-Décarie, E., Jewell, M. D., Fussmann, G. F., & Bell, G. (2013). Long-term culture at  
620 elevated atmospheric CO<sub>2</sub> fails to evoke specific adaptation in seven freshwater  
621 phytoplankton species. *Proc. Royal Soc. B*, 280.
- 622 Mongold, J. A., Bennett, A. F., & Lenski, R. E. (1996). Evolutionary adaptation to temperature.  
623 IV. Adaptation of *Escherichia coli* at a niche boundary. *Evolution*, 50, 35-43.
- 624 Monod, J. (1949). The growth of bacterial cultures. *Annu. Rev. Microbiol.*, 3, 371-394.
- 625 Nedwell, D. (1999). Effect of low temperature on microbial growth: lowered affinity for  
626 substrates limits growth at low temperature. *FEMS Microbiol. Ecol.*, 30, 101–111.
- 627 Nelson, D. M., Tréguer, P., Brzezinski, M. A., Leynaert, A., & Quéguiner, B. (1995). Production  
628 and dissolution of biogenic silica in the ocean: revised global estimates, comparison with  
629 regional data and relationship to biogenic sedimentation. *Global Biogeochem. Cy.*, 9, 359–  
630 372.
- 631 Neori, A., Vernet, M., Holm-Hansen, O., & Haxo, F. T. (1986). Relationship between action  
632 spectra for chlorophyll a fluorescence and photosynthetic O<sub>2</sub> evolution in algae. *J. Plankt.  
633 Res.*, 8, 537–548.
- 634 Norberg, J., Urban, M. C., Velland, M., Klausmeier, C. A., & Loeuille, N. (2012). Eco-  
635 evolutionary responses of biodiversity to climate change. *Nature Clim. Change*, 2, 747-751.
- 636 Padfield, D., Yvon-Durocher, G., Buckling, A., Jennings, S., & Yvon-Durocher, G. (2016).  
637 Rapid evolution of metabolic traits explains thermal adaptation in phytoplankton. *Ecol.  
638 Lett.*, 19, 133–142.
- 639 Pinheiro, J., Bates, D., DebRoy, S., Sarkar, D., & R Core Team (2017). *nlme: Linear and  
640 nonlinear mixed effects models*. R package version 3.1-131, [https://CRAN.R-  
641 project.org/package=nlme](https://CRAN.R-project.org/package=nlme).
- 642 Ratkowsky, D. A., Olley, J., Ross, T., Ratkowsky, D. A., Olley, J., & Ross, T. (2005). Unifying  
643 temperature effects on the growth rate of bacteria and the stability of globular proteins. *J.  
644 Theor. Biol.*, 233, 351–362.
- 645 Redfield, A. C. (1958). The biological control of chemical factors in the environment. *Am. Sci.*,  
646 Autumn, 205–221.

- 647 Reusch, T. B. H., & Boyd, P. W. (2013). Experimental evolution meets marine phytoplankton.  
648 *Evolution*, 67, 1849–1859.
- 649 Rowan, R. (2004). Thermal adaptation in reef coral symbionts. *Nature*, 430, 742.
- 650 Schiffers, K., Bourne, E. C., Lavergne, S., Thuiller, W., & Travis, J. M. J. (2013). Limited  
651 evolutionary rescue of locally adapted populations facing climate change. *Philos. Trans. R.*  
652 *Soc. Lond. B Biol. Sci.*, 368, 20120083.
- 653 Schlüter, L., Lohbeck, K. T., Gutowska, M. a., Gröger, J. P., Riebesell, U., & Reusch, T. B. H.  
654 (2014). Adaptation of a globally important coccolithophore to ocean warming and  
655 acidification. *Nature Clim. Change*, 4, 1024–1030.
- 656 Schoener, T. W. (2011). The newest synthesis: understanding the interplay of evolutionary and  
657 ecological dynamics. *Science*, 331, 426–429.
- 658 Thomas, M. K., Aranguren-Gassis, M., Kremer, C. T., Gould, M. R., Anderson, K., Klausmeier,  
659 C. A., & Litchman, E. (2017). Temperature-nutrient interactions exacerbate sensitivity to  
660 warming in phytoplankton. *Global Change Biol.*, doi:10.1111/gcb.13641,1–12.
- 661 Thomas, M. K., Kremer, C. T., Klausmeier, C. a., & Litchman, E. (2012). A global pattern of  
662 thermal adaptation in marine phytoplankton. *Science*, 338, 1085–1088.
- 663 Tilman, D. (1977). Resource competition between plankton algae: an experimental and  
664 theoretical approach. *Ecology*, 58, 338–348.
- 665 Tilman, D. (1982). *Resource competition and community structure*. Princeton University Press,  
666 Princeton, NJ, USA. pp. 1-297.
- 667 Tilman, D., Mattson, M., & Langer, S. (1981). Competition and nutrient kinetics along a  
668 temperature gradient: an experimental test of a mechanistic approach to niche theory.  
669 *Limnol. Oceanogr.*, 26, 1020–1033.
- 670
